# Supplementary material for: Urine Metabolome during Parturition
Source: MDPI journal article supplement (doi:10.3390/metabo10070290), 2020-07-16
Supplement: s1 [file s1]

Supplementary Material

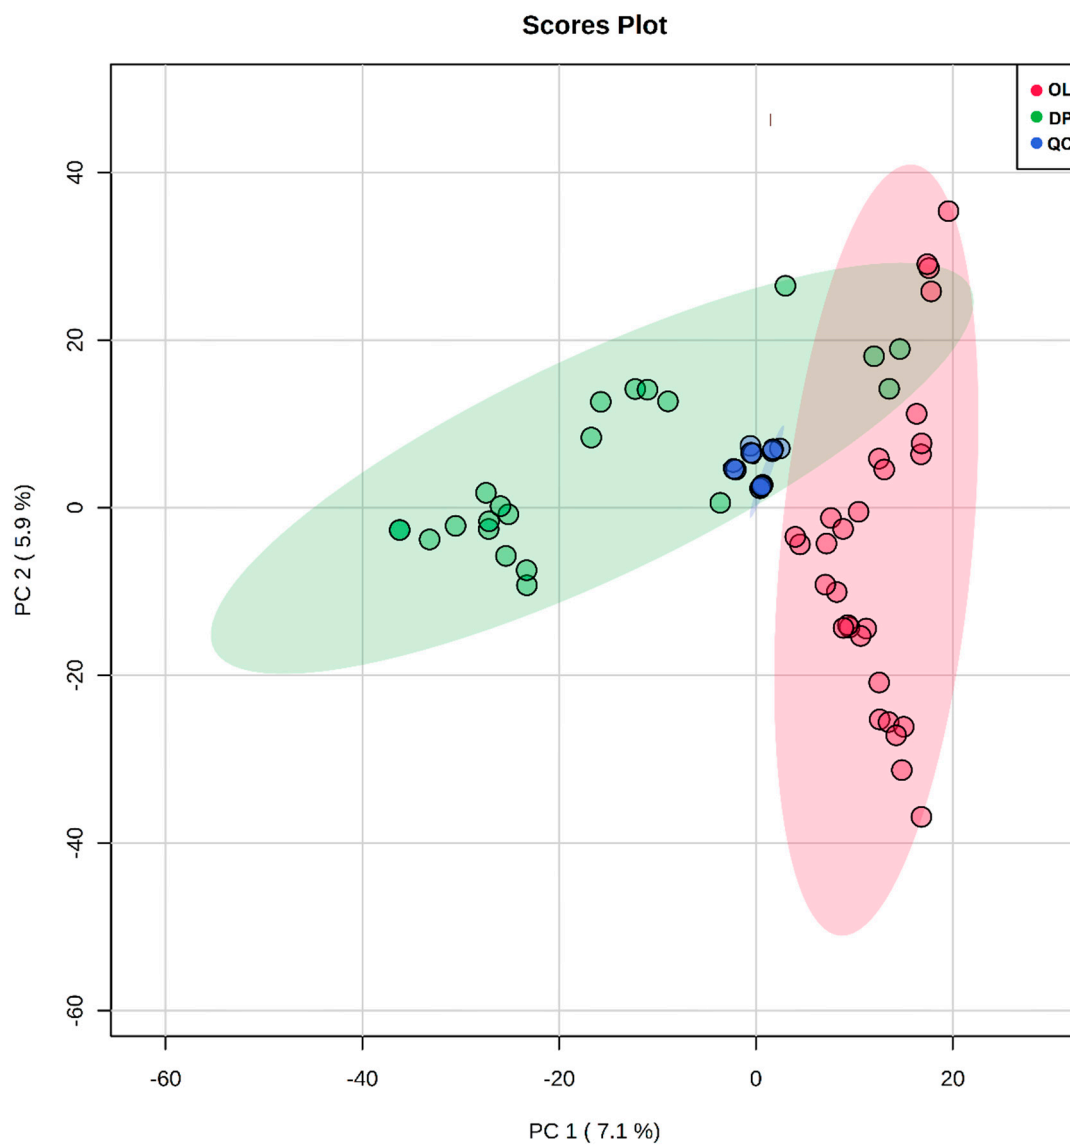

**Figure S1.** PCA analysis of metabolite profiling data. PCA was performed using urinary metabolomics of two sample sets OL (red) and DP (green).

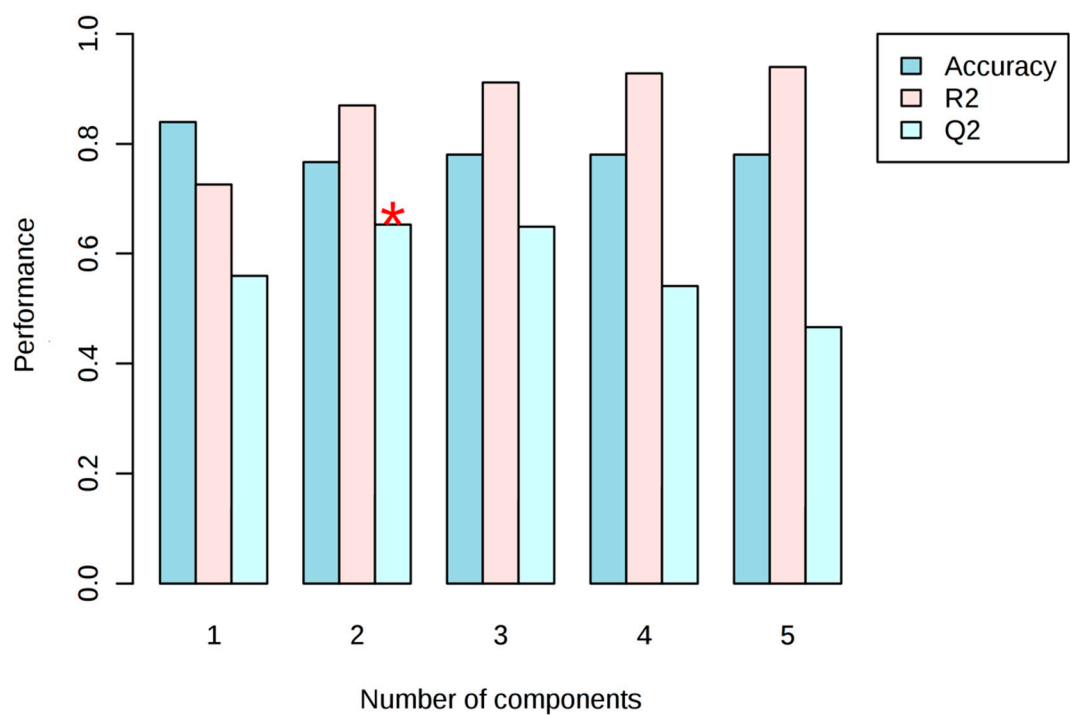

**Figure S2.** Cross validation chart. Blue bars: accuracy of the model; rose bars: R2 (variations); cyano: Q2 (prediction of the model). (\*) Indicates a component with a higher power of projection for differentiation among the group.

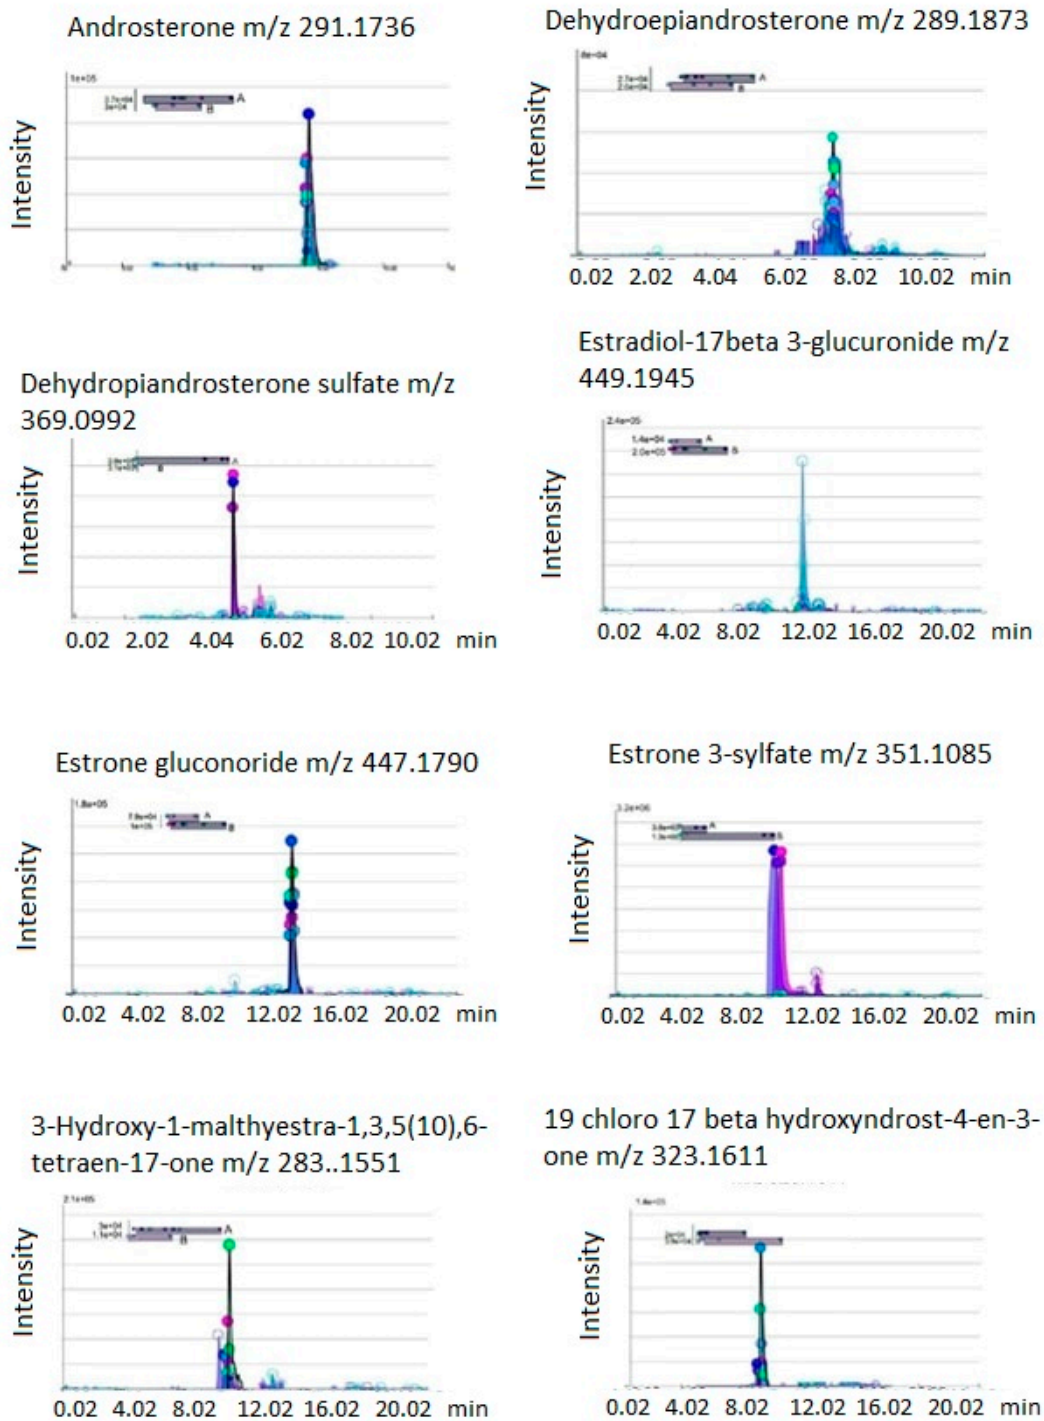

**Figure S3.** Electron ion chromatograms (EICs) of estrogens. (A) Samples collected in OL and (B) collected in IL-DP. The circle at the top of each EIC, represents an auto-generated quality score, with larger circles denoting higher quality of extraction. Estrogen peaks were obtained with a 5 ppm window, representing the mass accuracy of the instrument.

## Glucogenic Amino Acids

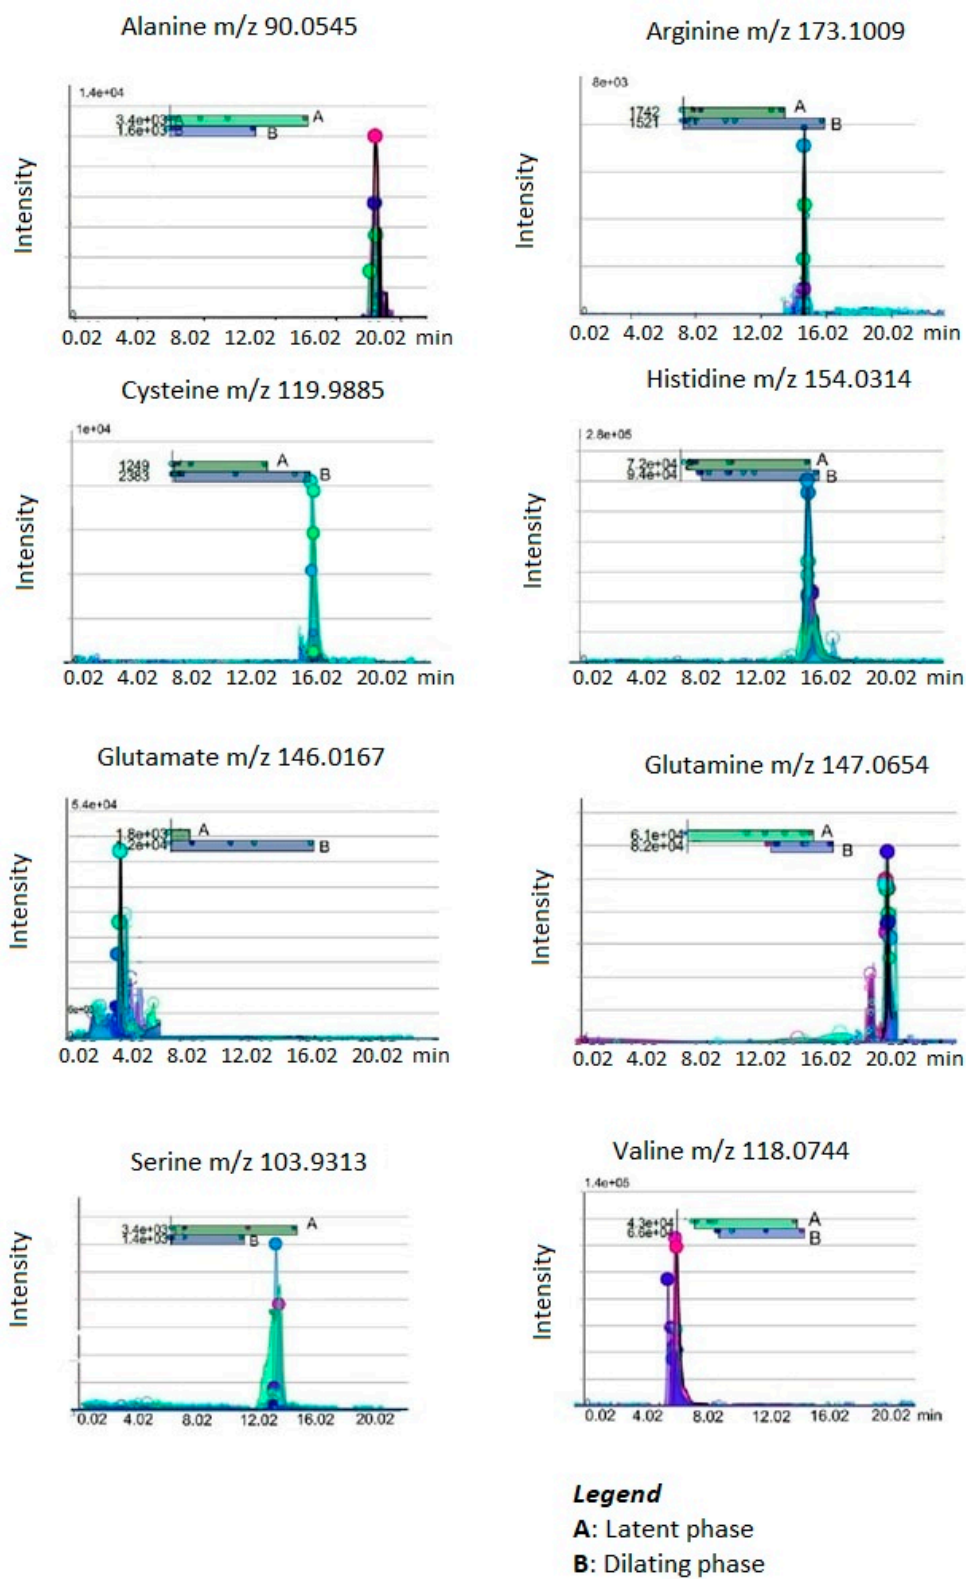

**Figure S4.** Electron-ion chromatograms (EICs) of glucogenic amino acids. (A) Samples collected in OL and (B) collected in DP. The circle at the top of each EIC, represents an auto-generated quality score, with larger circles denoting higher quality. Amino acids peaks were obtained with a 5 ppm window, representing the mass accuracy of the instrument.

## Glucogenic and ketogenic Amino Acids

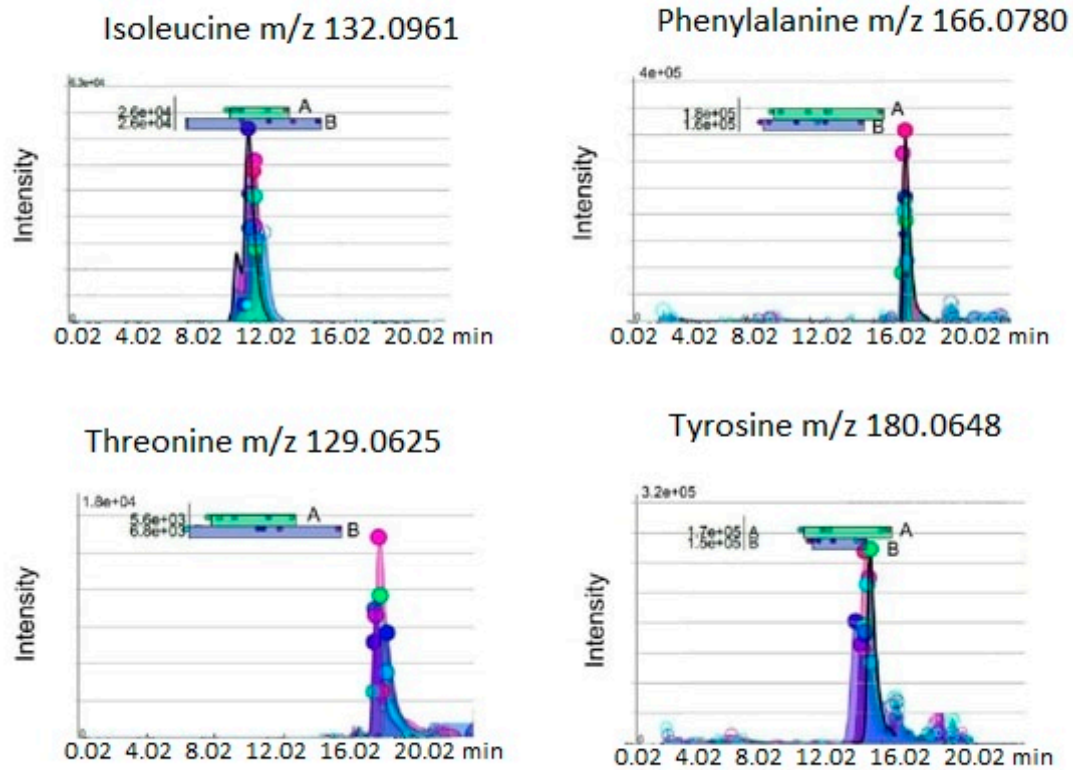

## Ketogenic Amino Acids

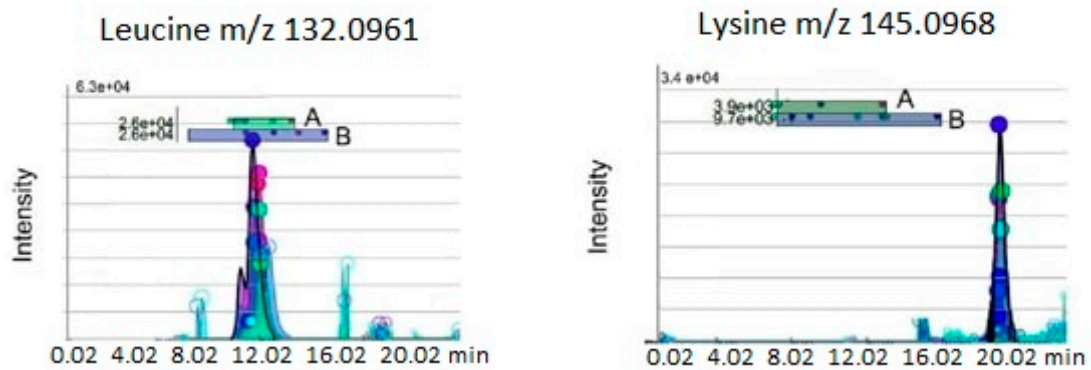

**Figure S5.** Electron-ion chromatograms (EICs) of ketogenic amino acids. (A) Samples collected in OL and (B) collected in DP. The circle at the top of each EIC, represents an auto-generated quality score, with larger circles denoting higher quality. Amino acids peaks were obtained with a 5 ppm window, representing the mass accuracy of the instrument.

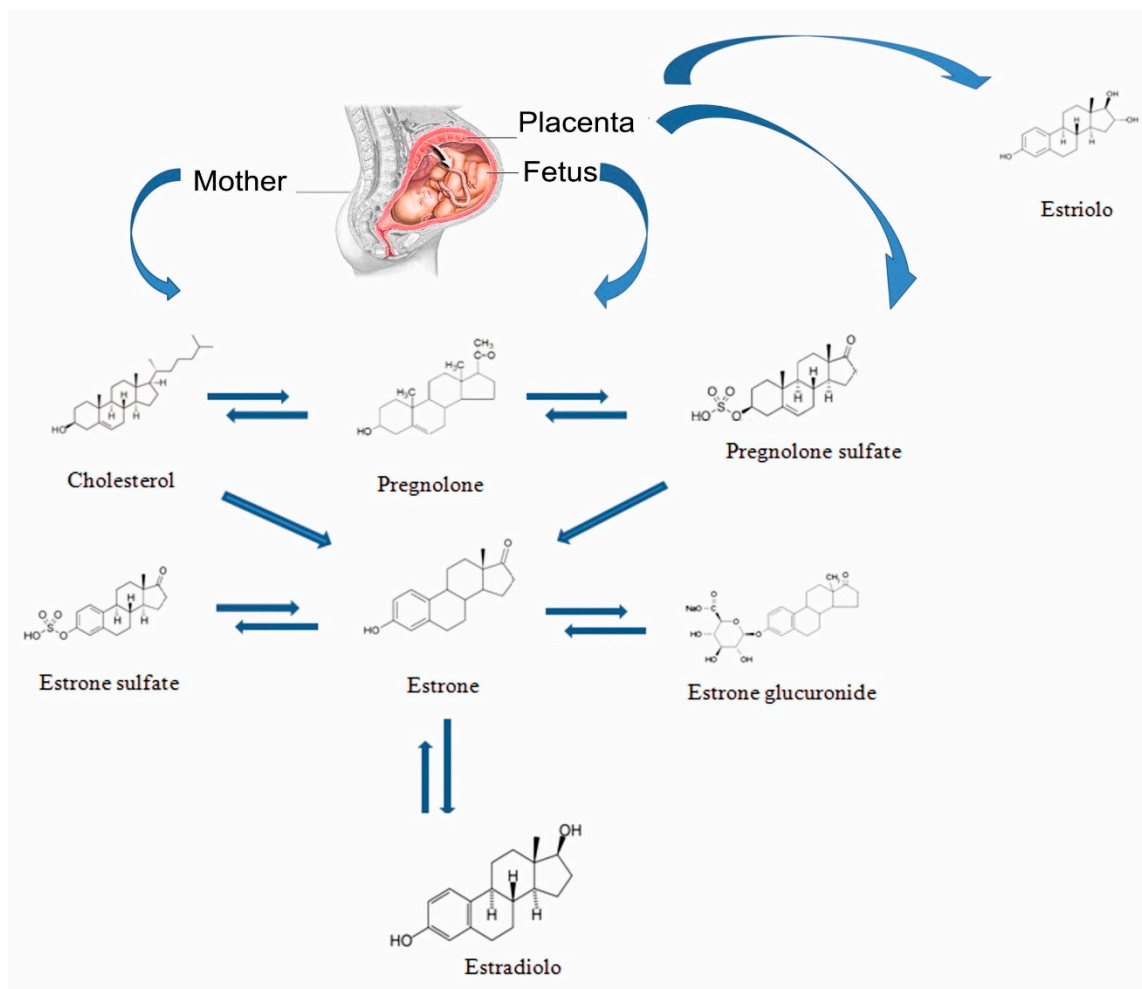

**Figure S6.** Scheme 1 shows the metabolism of estradiol in urine, by using our method all of these compounds could be detected simultaneously.

**Table S1.** The table shows the detailed results from the pathway analysis. In particular, the Total is the total number of compounds in the pathway; the Hits is the actually matched number from the user uploaded data; the Raw p is the original p value calculated from the enrichment analysis; the Holm p is the p value adjusted by Holm-Bonferroni method; the FDR p is the p value adjusted using False Discovery Rate; the Impact is the pathway impact value calculated from pathway topology analysis.

|                                                    | <b>Total Cmpd</b> | <b>Hits</b> | <b>Raw p</b> | <b>-log (p)</b> | <b>Holm adjusT</b> | <b>FDR</b> | <b>Impact</b> |
|----------------------------------------------------|-------------------|-------------|--------------|-----------------|--------------------|------------|---------------|
| Drug metabolism - other enzymes                    | 38                | 1           | 7.58 E-03    | 4.88 E+00       | 1.37 E-01          | 1.37 E-01  | 0.00          |
| Glycolysis or Gluconeogenesis                      | 31                | 1           | 1.66 E-02    | 4.10 E+00       | 2.82 E-01          | 1.49 E-01  | 0.00          |
| <u>Amino sugar and nucleotide sugar metabolism</u> | 88                | 4           | 4.10 E-02    | 3.20 E+00       | 6.55 E-01          | 1.92 E-01  | 0.00          |
| Galactose metabolism                               | 41                | 4           | 4.50 E-02    | 3.10 E+00       | 6.75 E-01          | 1.92 E-01  | 0.28          |
| Pentose phosphate pathway                          | 32                | 3           | 5.83 E-02    | 2.84 E+00       | 8.16 E-01          | 1.92 E-01  | 0.09          |
| Pyrimidine metabolism                              | 60                | 1           | 8.34 E-02    | 2.48 E+00       | 1.00 E+00          | 1.92 E-01  | 0.01          |
| Starch and sucrose metabolism                      | 50                | 4           | 9.04 E-02    | 2.40 E+00       | 1.00 E+00          | 1.92 E-01  | 0.02          |
| <u>Tyrosine metabolism</u>                         | 76                | 1           | 9.79 E-02    | 2.32 E+00       | 1.00 E+00          | 1.92 E-01  | 0.01          |
| Ascorbate and aldarate metabolism                  | 45                | 6           | 1.02 E-01    | 2.28 E+00       | 1.00 E+00          | 1.92 E-01  | 0.08          |
| Ether lipid metabolism                             | 23                | 1           | 1.12 E-01    | 2.19 E+00       | 1.00 E+00          | 1.92 E-01  | 0.00          |
| Glycerolipid metabolism                            | 32                | 2           | 1.17 E-01    | 2.14 E+00       | 1.00 E+00          | 1.92 E-01  | 0.02          |
| Citrate cycle (TCA cycle)                          | 20                | 1           | 1.55 E-01    | 1.86 E+00       | 1.00 E+00          | 2.14 E-01  | 0.06          |
| Glyoxylate and dicarboxylate metabolism            | 50                | 1           | 1.55 E-01    | 1.86 E+00       | 1.00 E+00          | 2.14 E-01  | 0.02          |
| Inositol phosphate metabolism                      | 39                | 1           | 1.67 E-01    | 1.79 E+00       | 1.00 E+00          | 2.14 E-01  | 0.00          |
| <u>Steroid hormone biosynthesis</u>                | 99                | 39          | 1.93 E-01    | 1.65 E+00       | 1.00 E+00          | 2.23 E-01  | 0.51          |
| Pentose and glucuronate interconversions           | 53                | 7           | 1.99 E-01    | 1.62 E+00       | 1.00 E+00          | 2.23 E-01  | 0.43          |
| Drug metabolism - cytochrome P450                  | 86                | 1           | 2.64 E-01    | 1.33 E+00       | 1.00 E+00          | 2.79 E-01  | 0.00          |
| Nicotinade and nicotinammide metabolism            | 44                | 2           | 5.61 E-01    | 5.78E-01        | 1.00 E+00          | 5.61 E-01  | 0.00          |
